# Supplementary material for: Highly sensitive determination of perphenazine on a carbon nanocomposite ionic liquid electrode
Source: Royal Society of Chemistry journal article supplement (doi:10.1039/c5ra14639a), 2015-01-01

## Supporting Information

### Highly Sensitive Determination of Perphenazine on a Carbon Nanocomposite Ionic Liquid Electrode

Farshid Fasihi<sup>a</sup>, Fatemeh Farjami<sup>\*a</sup>, Gholam Hossein Shafiee<sup>a</sup>

Figure S-1. FTIR spectra of the graphite powder, MWCNT, graphite/MWCNT/IL nanocomposite and the IL.

Figure S-2. Differential pulse voltammograms for 2  $\mu\text{M}$  PPZ at MWNT/CILE in the presence of different concentrations of AA. The concentration of AA ( $\mu\text{M}$ ): (a) 0, (b) 50, (c) 100, (d) 150, (e) 200 and (f) 220. Measurement conditions are the same as in Figure 5.

Figure S-3. Differential pulse voltammograms for 2  $\mu\text{M}$  PPZ at MWNT/CILE in the presence of different concentrations of UA. The concentration of UA ( $\mu\text{M}$ ): (a) 0, (b) 10, (c) 25, (d) 50, (e) 100 and (f) 120. Measurement conditions are the same as in Figure 5.

Figure S-4. Differential pulse voltammograms for 5  $\mu\text{M}$  PPZ at MWNT/CILE in the presence of different concentrations of catechol. The concentration of catechol ( $\mu\text{M}$ ): (a) 0, (b) 50, (c) 100, (d) 150, (e) 200 and (f) 220. Measurement conditions are the same as in Figure 5.

Figure S-1

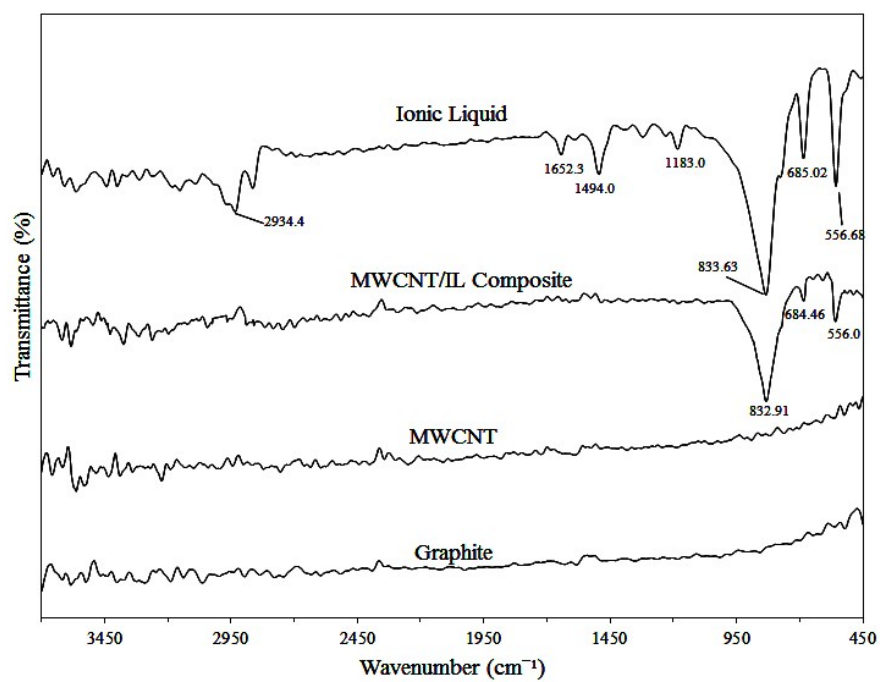

Figure S-2

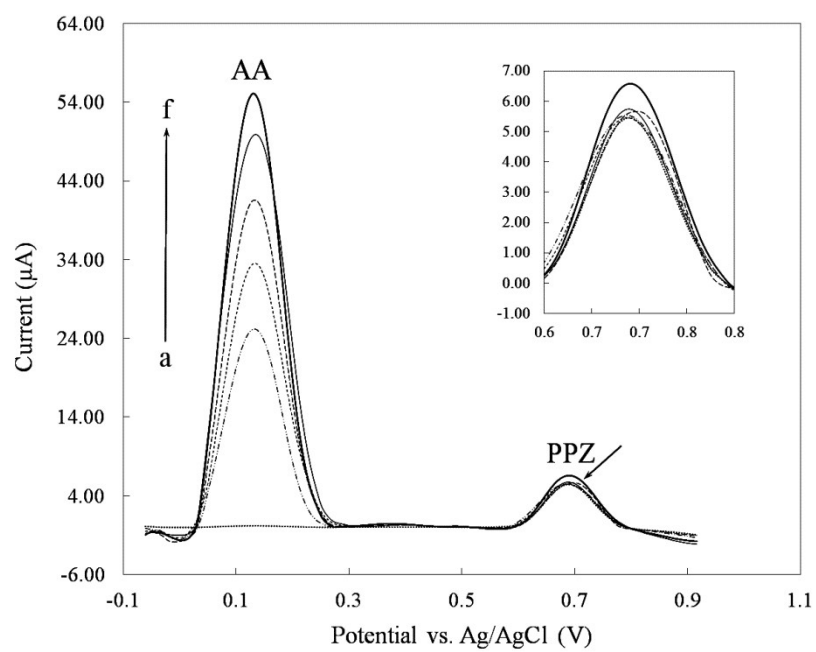

Figure S-3

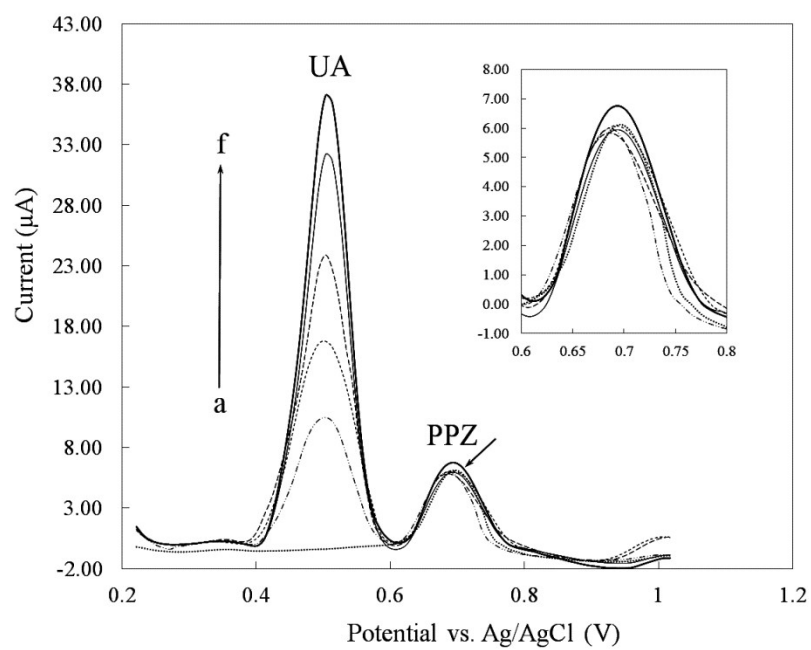

Figure S-4

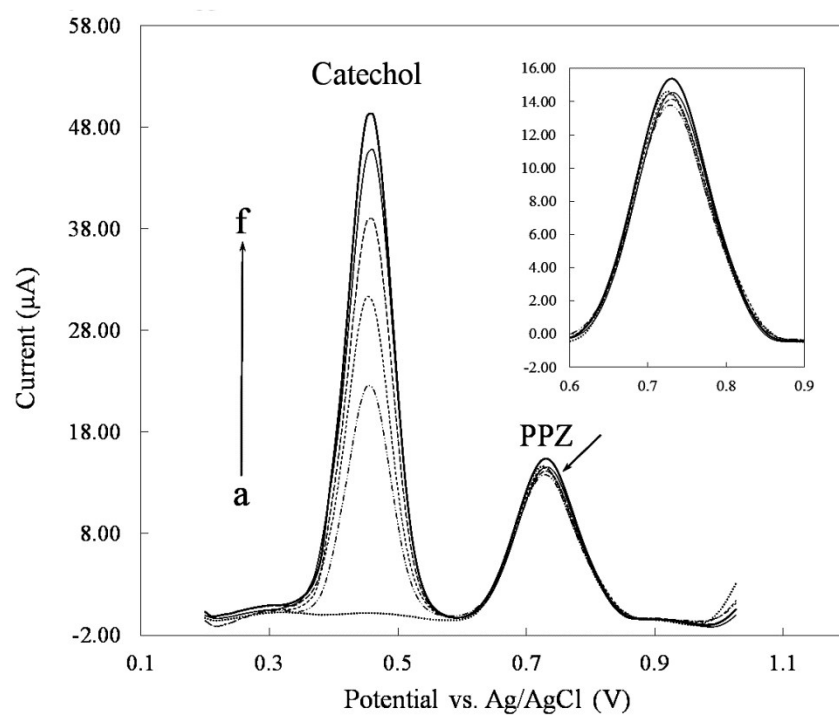

Supplement: c5ra14639a1.pdf [file c5ra14639a1.pdf]
